# Supplementary material for: Academic institutional entrepreneurs in Germany: navigating and shaping multi-level research commercialization governance
Source: Springer Nature journal article supplement (doi:10.1186/s40604-018-0057-5), 2018-12-01
Supplement: MOESM1 [file 16351910]

## Multilingual abstracts

### Arabic

**Liudvika Leisyte, Lisa Sigl**

المقولة المؤسسية الجامعية في ألمانيا. استعراض وتشكيل مستويات مختلفة لحوكمت وتسويق الأبحاث

تهدف هذه المقالة إلى استكشاف كيف تتمكن جماعة المقاولين في المجال العلمي ومديري البحث من تشكيل إطار المراحل الثلاثة. اعتمدت هذه الدراسة على وثائق رسمية وعلى إجراء مقابلات معمقة مع مديري البحث في الدولة الألمانية بولاية شمال الراين - ويستفاليا، لتبين أن الثقة التي منحها مديري البحث إلى المقاولين في المجال العلمي، مكانتهم العلمية والقيادية بالإضافة إلى نوع المقاول الأكاديمي تشكل عوامل أساسية في تحديد العلاقة بين المراحل الثلاثة. يقدم مديري البحث أنفسهم على أنهم مجرد مزودي خدمات للأنشطة التسويقية للعلماء بينما ينظر إليهم العلماء على أنهم يقومون بتسهيل الاتفاقيات من أجل بعث مواطن شغل مبتكرة. يعتبر مديري البحث أن العلماء هم عبارة على مخاطرين مبدعين ومتحفزين. يتفاوض مقاولي المجال العلمي الذين وقعت دراستهم على القوانين الرسمية ويتوصلون إلى حلول مرنة بشأن الحواجز الهيكلية في مؤسسات الأبحاث التي ينتمون إليها. لكنهم يميلون في نفس الوقت إلى تجنب أخذ مخاطر شخصية عندما يتعلق الأمر بإجراءات تعاقدية وبمستقبلهم المهني. تحدد الدراسة ممارسة نوعين من التنظيم لتحديد مجال المراحل الثلاثة- الفردي وريادة الأعمال عبر المؤسسات. يمهّد القيام الفردي بالنشاط والثقة في مديري البحث في مجال ريادة الأعمال واستقلالية المقاولين في المجال العلمي لتأسيس التغيير المؤسسي. يمكن أن يكون هذا سبباً في هيكلة مجال ريادة الأعمال وإعادة تشكيل العلاقات بين المراحل الثلاثة في سياق معين.
